# Supplementary material for: Group vs Individual Prenatal Care and Gestational Diabetes Outcomes: A Secondary Analysis of a Randomized Clinical Trial
Source: PubMed Central journal article supplement (PMC10466168; doi:10.1001/jamanetworkopen.2023.30763), 2023-08-29
Supplement: jamanetwopen-e2330763-s002.pdf [file jamanetwopen-e2330763-s002.pdf]

## Supplemental Online Content

Chen Y, Crockett AH, Britt JL, et al. Group vs individual prenatal care and gestational diabetes outcomes. *JAMA Netw Open*. 2023;6(8):e2330763. doi:10.1001/jamanetworkopen.2023.30763

**eFigure.** CRADLE trial CONSORT Diagram Showing Eligibility, Randomization, Follow-Up, and Outcomes Availability, Modified Intent-to-Treat (MITT) Sample

**eTable 1.** Baseline Characteristics and Prognostic Risk Factors for GDM by Intervention Arms: Group Prenatal Care (GPNC) Group vs. Individual Prenatal Care (IPNC) Group in CRADLE Study

**eTable 2.** Modified Intention-to-Treat Analysis for Comparing the Risk Of GDM by Intervention Arms: Group Prenatal Care (GPNC) Group vs. Individual Prenatal Care (IPNC) Group in CRADLE Study

**eTable 3.** Modified Intention-to-Treat Analysis for Comparing the Risks of Progression to A2 GDM and GDM-Related Obstetric Outcomes by Intervention Arms: Group Prenatal Care (GPNC) Group vs. Individual Prenatal Care (IPNC) Group in CRADLE Study

**eTable 4.** Sensitivity Analysis for Comparing the Risk of GDM by Intervention Arms: Group Prenatal Care (GPNC) Group vs. Individual Prenatal Care (IPNC) Group in CRADLE Study

**eTable 5.** Sensitivity Analysis for Comparing the Risks of Progression to A2 GDM and GDM-Related Obstetric Outcomes by Intervention Arms: Group Prenatal Care (GPNC) Group vs. Individual Prenatal Care (IPNC) Group in CRADLE Study

This supplemental material has been provided by the authors to give readers additional information about their work.

**eFigure. CRADLE trial CONSORT Diagram Showing Eligibility, Randomization, Follow-Up, and Outcomes Availability, Modified Intent-To-Treat (mITT) sample**

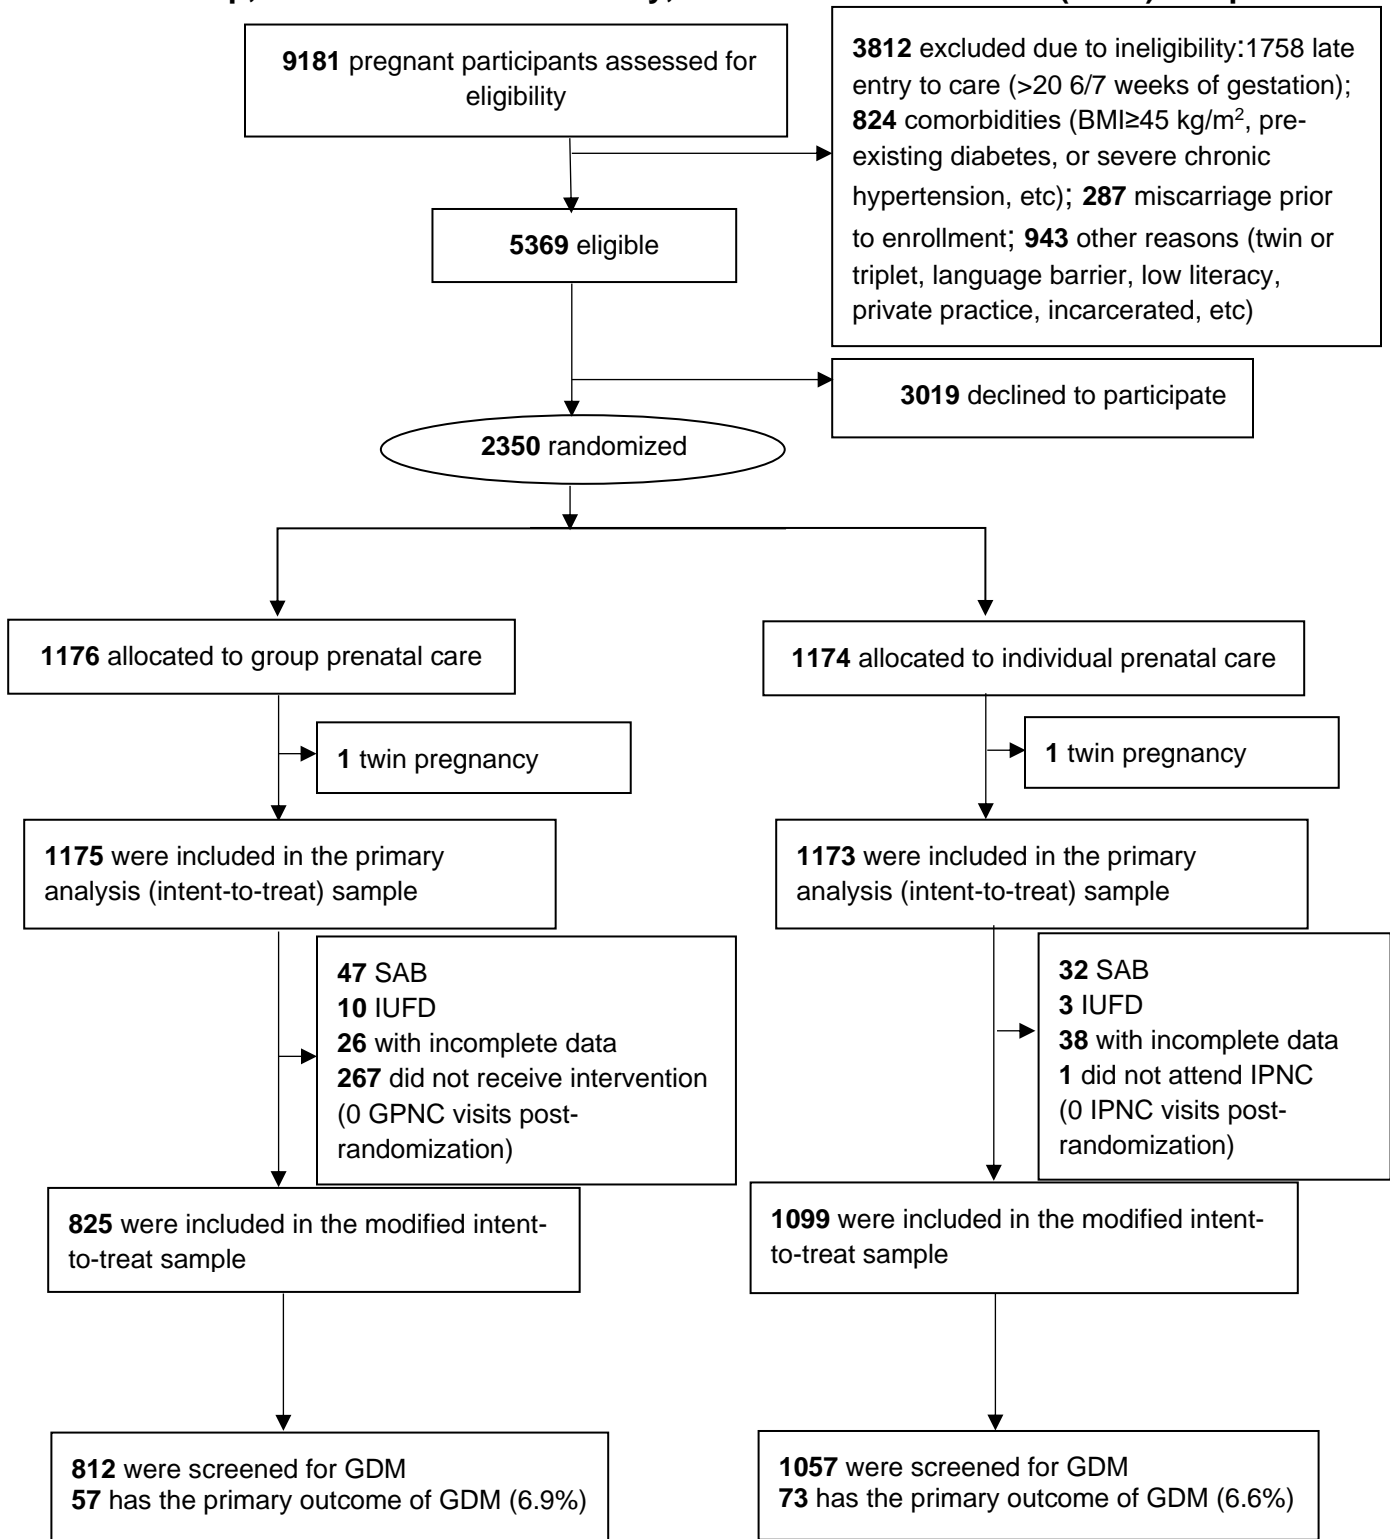

Abbreviations: BMI: Body Mass Index; GDM: Gestational Diabetes Mellitus; SAB: Spontaneous Abortion; IUFD: Intrauterine Fetal Demise; GPNC: Group Prenatal Care; IPNC: Individual Prenatal Care

**eTable 1. Baseline Characteristics and Prognostic Risk Factors for GDM by Intervention Arms: Group Prenatal Care (GPNC) Group vs. Individual Prenatal Care (IPNC) Group in CRADLE Study<sup>a</sup>**

| Characteristics, N (%)                                        | IPNC Group<br>N=1,099 | GPNC Group<br>N=825 |
|---------------------------------------------------------------|-----------------------|---------------------|
| Race and ethnicity                                            |                       |                     |
| Black                                                         | 437 (39.8)            | 330 (40.0)          |
| Hispanic                                                      | 238 (21.7)            | 193 (23.4)          |
| White                                                         | 410 (37.3)            | 292 (35.4)          |
| Other/ Mixed <sup>b</sup>                                     | 14 (1.3)              | 10 (1.2)            |
| Maternal age, Mean (SD), years                                | 25.0 (5.3)            | 25.4 (5.5)          |
| Pre-pregnancy BMI <sup>c</sup> , Mean (SD), kg/m <sup>2</sup> | 28.8 (7.1)            | 28.9 (7.2)          |
| Pre-pregnancy BMI <sup>c</sup> status                         |                       |                     |
| Underweight (BMI < 18.5 kg/m <sup>2</sup> )                   | 37 (3.4)              | 29 (3.5)            |
| Normal weight (18.5 ≤ BMI < 25.0 kg/m <sup>2</sup> )          | 364 (33.1)            | 270 (32.7)          |
| Overweight (25.0 ≤ BMI < 30.0 kg/m <sup>2</sup> )             | 281 (25.6)            | 197 (23.9)          |
| Obese (BMI ≥ 30.0 kg/m <sup>2</sup> )                         | 417 (37.9)            | 329 (39.9)          |
| High school education or above                                | 759 (69.1)            | 582 (70.6)          |
| Student status for the past year                              |                       |                     |
| Not a student                                                 | 783 (71.3)            | 587 (71.2)          |
| High school student (or working on GED)                       | 144 (13.1)            | 89 (10.8)           |
| Community, technical, and four-year college student           | 124 (11.3)            | 94 (11.4)           |
| Employment                                                    |                       |                     |
| Employed                                                      | 554 (50.4)            | 432 (52.4)          |
| Unemployed                                                    | 244 (22.2)            | 172 (20.9)          |
| Keeping house or caring for family full time                  | 240 (21.8)            | 170 (20.6)          |
| Marital status                                                |                       |                     |
| Married                                                       | 701 (71.3)            | 537 (72.0)          |
| Unknown                                                       | 160 (14.6)            | 109 (13.2)          |
| Annual household income                                       |                       |                     |
| Less than \$10,000                                            | 237 (21.6)            | 183 (22.2)          |
| \$10,000 to less than \$20,000                                | 224 (20.4)            | 175 (21.2)          |
| \$20,000 to less than \$50,000                                | 271 (24.7)            | 201 (24.4)          |

|                                                                                                                                                                                                                                                                                          |             |             |
|------------------------------------------------------------------------------------------------------------------------------------------------------------------------------------------------------------------------------------------------------------------------------------------|-------------|-------------|
| \$50,000 or more                                                                                                                                                                                                                                                                         | 34 (3.1)    | 21 (2.6)    |
| Unknown                                                                                                                                                                                                                                                                                  | 333 (30.3)  | 245 (29.7)  |
| Health insurance                                                                                                                                                                                                                                                                         |             |             |
| Had health insurance in the past year                                                                                                                                                                                                                                                    | 540 (49.1)  | 392 (47.5)  |
| Unknown                                                                                                                                                                                                                                                                                  | 127 (11.6)  | 100 (12.1)  |
| Nulliparous                                                                                                                                                                                                                                                                              | 486 (44.2)  | 357 (43.3)  |
| Perceived family support, Mean (SD)                                                                                                                                                                                                                                                      | 3.4 (0.6)   | 3.4 (0.6)   |
| Smoked tobacco during the three months before pregnancy                                                                                                                                                                                                                                  | 425 (38.7)  | 247 (29.9)  |
| Unintended pregnancy                                                                                                                                                                                                                                                                     | 702 (63.9)  | 524 (63.5)  |
| <b>Prognostic factors</b>                                                                                                                                                                                                                                                                |             |             |
| Total gestational weight gain, Mean (SD), lb                                                                                                                                                                                                                                             | 24.5 (16.6) | 24.8 (16.3) |
| Smoked tobacco during this pregnancy                                                                                                                                                                                                                                                     | 206 (18.7)  | 127 (15.4)  |
| Consumed alcohol during this pregnancy                                                                                                                                                                                                                                                   | 39 (3.6)    | 34 (4.1)    |
| Smoked marijuana during this pregnancy                                                                                                                                                                                                                                                   | 50 (4.6)    | 39 (4.7)    |
| <p>Note:</p> <p><sup>a</sup>The analyses were conducted among the modified intention-to-treat (mITT) sample</p> <p><sup>b</sup>Other indicated Asian, Native Hawaiian, Other Pacific Islander, or Unknown</p> <p><sup>c</sup>Pre-pregnancy BMI measured at first prenatal care visit</p> |             |             |

**eTable 2. Modified Intention-to-Treat Analysis for Comparing the Risk Of GDM by Intervention Arms: Group Prenatal Care (GPNC) Group vs. Individual Prenatal Care (IPNC) Group in CRADLE Study**

|                                                                                                                                                                                                                                                                                                                                                                                             | Intervention Arms |        | Unadjusted Risk Difference |         | Adjusted Risk Difference <sup>a</sup> |         |
|---------------------------------------------------------------------------------------------------------------------------------------------------------------------------------------------------------------------------------------------------------------------------------------------------------------------------------------------------------------------------------------------|-------------------|--------|----------------------------|---------|---------------------------------------|---------|
|                                                                                                                                                                                                                                                                                                                                                                                             | IPNC              | GPNC   | RD (95% CI)                | P value | RD (95% CI)                           | P value |
| <b>All participants</b>                                                                                                                                                                                                                                                                                                                                                                     |                   |        |                            |         |                                       |         |
| GDM/Total                                                                                                                                                                                                                                                                                                                                                                                   | 73/1099           | 57/825 |                            |         |                                       |         |
| GDM incidence, %                                                                                                                                                                                                                                                                                                                                                                            | 6.6               | 6.9    | 0.27 (-2.0 to 2.5)         | 0.82    | 0.043 (-2.2 to 2.3)                   | 0.97    |
| <b>Black</b>                                                                                                                                                                                                                                                                                                                                                                                |                   |        |                            |         |                                       |         |
| GDM/Total                                                                                                                                                                                                                                                                                                                                                                                   | 19/437            | 13/330 |                            |         |                                       |         |
| GDM incidence, %                                                                                                                                                                                                                                                                                                                                                                            | 4.4               | 3.9    | -0.41 (-3.3 to 2.4)        | 0.78    | -0.42 (-3.1 to 2.3)                   | 0.76    |
| <b>Hispanic</b>                                                                                                                                                                                                                                                                                                                                                                             |                   |        |                            |         |                                       |         |
| GDM/Total                                                                                                                                                                                                                                                                                                                                                                                   | 27/238            | 21/193 |                            |         |                                       |         |
| GDM incidence, %                                                                                                                                                                                                                                                                                                                                                                            | 11.3              | 10.9   | -0.46 (-6.4 to 5.5)        | 0.88    | -1.00 (-7.2 to 5.2)                   | 0.75    |
| <b>White</b>                                                                                                                                                                                                                                                                                                                                                                                |                   |        |                            |         |                                       |         |
| GDM/Total                                                                                                                                                                                                                                                                                                                                                                                   | 25/410            | 23/292 |                            |         |                                       |         |
| GDM incidence, %                                                                                                                                                                                                                                                                                                                                                                            | 6.1               | 7.9    | 1.80 (-2.1 to 5.6)         | 0.36    | 1.80 (-2.1 to 5.7)                    | 0.35    |
| Notes:                                                                                                                                                                                                                                                                                                                                                                                      |                   |        |                            |         |                                       |         |
| <sup>a</sup> The regression model was adjusted for all baseline characteristics including smoking before pregnancy, race and ethnicity, maternal age, body mass index at enrollment, education, employment, student status for the past year, annual household income, had dental visit for the last 2 years, had insurance for the past year, parity, marital status, unintended pregnancy |                   |        |                            |         |                                       |         |
| Abbreviation: GDM, gestational diabetes mellitus; CI, Confidence Interval; RD, Risk Difference                                                                                                                                                                                                                                                                                              |                   |        |                            |         |                                       |         |

**eTable 3. Modified Intention-to-Treat Analysis for Comparing the Risks of Progression to A2 GDM and GDM-Related Obstetric Outcomes by Intervention Arms: Group Prenatal Care (GPNC) Group vs. Individual Prenatal Care (IPNC) Group in CRADLE Study**

|                                                                                                                                                                                                                                                                                                                                                                                                                                                                                                                                | Intervention Arms |       | Unadjusted Risk Difference |         | Adjusted Risk Difference <sup>a</sup> |         |
|--------------------------------------------------------------------------------------------------------------------------------------------------------------------------------------------------------------------------------------------------------------------------------------------------------------------------------------------------------------------------------------------------------------------------------------------------------------------------------------------------------------------------------|-------------------|-------|----------------------------|---------|---------------------------------------|---------|
|                                                                                                                                                                                                                                                                                                                                                                                                                                                                                                                                | IPNC              | GPNC  | RD (95% CI)                | P value | RD (95% CI)                           | P value |
| <b>All participants</b>                                                                                                                                                                                                                                                                                                                                                                                                                                                                                                        |                   |       |                            |         |                                       |         |
| Progression to A2 GDM/Total                                                                                                                                                                                                                                                                                                                                                                                                                                                                                                    | 37/73             | 26/57 |                            |         |                                       |         |
| Progression to A2 GDM incidence, %                                                                                                                                                                                                                                                                                                                                                                                                                                                                                             | 50.7              | 45.6  | -5.07 (-22.4 to 12.2)      | 0.57    | -5.69 (-23.0 to 11.6)                 | 0.52    |
| Preeclampsia/Total                                                                                                                                                                                                                                                                                                                                                                                                                                                                                                             | 12/73             | 4/57  |                            |         |                                       |         |
| Preeclampsia incidence, %                                                                                                                                                                                                                                                                                                                                                                                                                                                                                                      | 16.4              | 7.0   | -9.42 (-20.2 to 1.4)       | 0.12    | -6.36 (-17.4 to 4.7)                  | 0.30    |
| Cesarean delivery/Total                                                                                                                                                                                                                                                                                                                                                                                                                                                                                                        | 12/73             | 6/57  |                            |         |                                       |         |
| Cesarean delivery incidence, %                                                                                                                                                                                                                                                                                                                                                                                                                                                                                                 | 16.4              | 10.5  | -3.61 (-18.1 to 10.9)      | 0.63    | 1.70 (-12.0 to 15.4)                  | 0.81    |
| LGA/Total                                                                                                                                                                                                                                                                                                                                                                                                                                                                                                                      | 3/73              | 1/57  |                            |         |                                       |         |
| LGA incidence, %                                                                                                                                                                                                                                                                                                                                                                                                                                                                                                               | 4.1               | 1.8   | -2.36 (-8.0 to 3.3)        | 0.46    | -1.44 (-7.6 to 4.7)                   | 0.67    |
| Notes:                                                                                                                                                                                                                                                                                                                                                                                                                                                                                                                         |                   |       |                            |         |                                       |         |
| <sup>a</sup> The regression model was adjusted for all baseline characteristics including smoking before pregnancy, race and ethnicity, maternal age, body mass index at enrollment, education, employment, student status for the past year, annual household income, had dental visit for the last 2 years, had insurance for the past year, parity, marital status, unintended pregnancy<br>Abbreviation: A2 GDM, GDM managed with medication; LGA, large-for-gestational-age; CI, Confidence Interval; RD, Risk Difference |                   |       |                            |         |                                       |         |

**eTable 4. Sensitivity Analysis for Comparing the Risk of GDM by Intervention Arms: Group Prenatal Care (GPNC) Group vs. Individual Prenatal Care (IPNC) Group in CRADLE Study<sup>a</sup>**

|                                                                                                                                                                                                                                                                                                                                                                                             | Intervention Arms |         | Unadjusted Risk Difference |         | Adjusted Risk Difference <sup>b</sup> |         |
|---------------------------------------------------------------------------------------------------------------------------------------------------------------------------------------------------------------------------------------------------------------------------------------------------------------------------------------------------------------------------------------------|-------------------|---------|----------------------------|---------|---------------------------------------|---------|
|                                                                                                                                                                                                                                                                                                                                                                                             | IPNC              | GPNC    | RD (95% CI)                | P value | RD (95% CI)                           | P value |
| <b>All participants</b>                                                                                                                                                                                                                                                                                                                                                                     |                   |         |                            |         |                                       |         |
| GDM/Total                                                                                                                                                                                                                                                                                                                                                                                   | 69/1087           | 73/1090 |                            |         |                                       |         |
| GDM incidence, %                                                                                                                                                                                                                                                                                                                                                                            | 6.4               | 6.7     | 0.35 (-1.7 to 2.4)         | 0.74    | -0.21 (-5.7 to 5.4)                   | 0.94    |
| <b>Black</b>                                                                                                                                                                                                                                                                                                                                                                                |                   |         |                            |         |                                       |         |
| GDM/Total                                                                                                                                                                                                                                                                                                                                                                                   | 18/443            | 22/444  |                            |         |                                       |         |
| GDM incidence, %                                                                                                                                                                                                                                                                                                                                                                            | 4.1               | 5.0     | 0.89 (-1.8 to 3.6)         | 0.52    | 0.80 (-3.2 to 4.8)                    | 0.70    |
| <b>Hispanic</b>                                                                                                                                                                                                                                                                                                                                                                             |                   |         |                            |         |                                       |         |
| GDM/Total                                                                                                                                                                                                                                                                                                                                                                                   | 25/227            | 20/233  |                            |         |                                       |         |
| GDM incidence, %                                                                                                                                                                                                                                                                                                                                                                            | 11.0              | 8.6     | -2.43 (-7.9 to 3.0)        | 0.38    | -2.73 (-8.4 to 2.9)                   | 0.34    |
| <b>White</b>                                                                                                                                                                                                                                                                                                                                                                                |                   |         |                            |         |                                       |         |
| GDM/Total                                                                                                                                                                                                                                                                                                                                                                                   | 23/402            | 30/398  |                            |         |                                       |         |
| GDM incidence, %                                                                                                                                                                                                                                                                                                                                                                            | 5.7               | 7.5     | 1.82 (-1.6 to 5.3)         | 0.30    | 1.25 (-9.1 to 11.6)                   | 0.81    |
| Notes:                                                                                                                                                                                                                                                                                                                                                                                      |                   |         |                            |         |                                       |         |
| <sup>a</sup> The analyses were conducted excluding participants whose study participation could be affected by COVID-19 pandemic.                                                                                                                                                                                                                                                           |                   |         |                            |         |                                       |         |
| <sup>b</sup> The regression model was adjusted for all baseline characteristics including smoking before pregnancy, race and ethnicity, maternal age, body mass index at enrollment, education, employment, student status for the past year, annual household income, had dental visit for the last 2 years, had insurance for the past year, parity, marital status, unintended pregnancy |                   |         |                            |         |                                       |         |
| Abbreviation: GDM, gestational diabetes mellitus; CI, Confidence Interval; RD, Risk Difference                                                                                                                                                                                                                                                                                              |                   |         |                            |         |                                       |         |

**eTable 5. Sensitivity Analysis for Comparing the Risks of Progression to A2 GDM and GDM-Related Obstetric Outcomes by Intervention Arms: Group Prenatal Care (GPNC) Group vs. Individual Prenatal Care (IPNC) Group in CRADLE Study<sup>a</sup>**

|                                    | Intervention Arms |       | Unadjusted Risk Difference |         | Adjusted Risk Difference <sup>b</sup> |         |
|------------------------------------|-------------------|-------|----------------------------|---------|---------------------------------------|---------|
|                                    | IPNC              | GPNC  | RD (95% CI)                | P value | RD (95% CI)                           | P value |
| <b>All participants</b>            |                   |       |                            |         |                                       |         |
| Progression to A2 GDM/Total        | 36/69             | 34/71 |                            |         |                                       |         |
| Progression to A2 GDM incidence, % | 52.2              | 47.9  | -4.29 (-20.8 to 12.3)      | 0.61    | -6.10 (-24.5 to 12.3)                 | 0.52    |
| Preeclampsia/Total                 | 11/69             | 6/73  |                            |         |                                       |         |
| Preeclampsia incidence, %          | 15.9              | 8.2   | -7.72 (-18.4 to 3.0)       | 0.16    | -3.36 (-15.3 to 8.6)                  | 0.58    |
| Cesarean delivery/Total            | 11/69             | 8/73  |                            |         |                                       |         |
| Cesarean delivery incidence, %     | 15.9              | 11.0  | -4.98 (-16.2 to 6.2)       | 0.38    | 0.68 (-10.3 to 11.7)                  | 0.90    |
| LGA/Total                          | 3/69              | 2/73  |                            |         |                                       |         |
| LGA incidence, %                   | 48.6              | 2.7   | -1.61 (-7.7 to 4.5)        | 0.61    | -0.04 (-7.4 to 7.4)                   | 0.99    |

Notes:

<sup>a</sup>The analyses were conducted excluding participants whose study participation could be affected by COVID-19 pandemic.

<sup>b</sup>The regression model was adjusted for all baseline characteristics including smoking before pregnancy, race and ethnicity, maternal age, body mass index at enrollment, education, employment, student status for the past year, annual household income, had dental visit for the last 2 years, had insurance for the past year, parity, marital status, unintended pregnancy

Abbreviation: A2 GDM, GDM managed with medication; LGA, large-for-gestational-age; CI, Confidence Interval; RD, Risk Difference
