# Supplementary material for: Group vs Individual Prenatal Care and Gestational Diabetes Outcomes: A Secondary Analysis of a Randomized Clinical Trial
Source: PubMed Central journal article supplement (PMC10466168; doi:10.1001/jamanetworkopen.2023.30763), 2023-08-29
Supplement: jamanetwopen-e2330763-s003.pdf [file jamanetwopen-e2330763-s003.pdf]

## Data Sharing Statement

Chen. Group vs Individual Prenatal Care and Gestational Diabetes Outcomes. *JAMA Netw Open*. Published August 29, 2023. doi:10.1001/jamanetworkopen.2023.30763

### Data

**Data available:** Yes

**Data types:** Deidentified participant data, Data dictionary, Other (please specify)

**Additional Information:** Deidentified study data will be available publicly on the NICHD/DASH Data and Specimen Hub (<https://dash.nichd.nih.gov/>) in October 2026, five years after study completion. Prior to that time, researchers with a methodologically sound proposal can direct inquiries to [amy.crockett@prismahealth.org](mailto:amy.crockett@prismahealth.org) to gain access to the study protocol, informed consent forms, deidentified data, data dictionaries and the analytic plan. Requestors will need to sign a data access agreement.

**How to access data:** By request.

**When available:** beginning date: 10-01-2026

### Supporting Documents

**Document types:** None

### Additional Information

**Who can access the data:** Researchers whose proposed use of the data has been approved

**Types of analyses:** None

**Mechanisms of data availability:** After approval of a proposal, or with a signed data access agreement
